1 **Identification of a critical horseshoe-shaped region in the nsp5 (Mpro, 3CLpro) protease**  
2 **interdomain loop (IDL) of coronavirus mouse hepatitis virus (MHV)**

3

4 Benjamin C. Nick<sup>a</sup>, Mansi C. Pandya<sup>a</sup>, Xiaotao Lu<sup>b</sup>, Megan E. Franke<sup>a</sup>, Sean M. Callahan<sup>a</sup>,  
5 Emily F. Hasik<sup>a</sup>, Sean T. Berthrong<sup>a</sup>, Mark R. Denison<sup>b,c</sup>, and Christopher C. Stobart<sup>a,#</sup>

6

7 <sup>a</sup>Department of Biological Sciences, Butler University, Indianapolis, IN USA

8 <sup>b</sup>Department of Pediatrics, Vanderbilt University School of Medicine, Nashville, TN USA

9 <sup>c</sup>Department of Pathology, Microbiology, and Immunology, Vanderbilt University School of  
10 Medicine, Nashville, TN USA

11

12 Running Title: A Critical Loop Region in Coronavirus Protease nsp5

13

14 <sup>#</sup>Corresponding Author: [cstobart@butler.edu](mailto:cstobart@butler.edu)

15

16 Note on Authorship Order: Authorship order is listed based on extent of research contributions to  
17 this publication with the exception of the final three authors who are PIs listed in reverse order  
18 based on lab support and involvement.

19

20 Abstract Word Count: 250

21 Importance Word Count: 147

22 Manuscript Word Count: 4,099

23

24

25 **Abstract**

26

27 Human coronaviruses are enveloped, positive-strand RNA viruses which cause respiratory  
28 diseases ranging in severity from the seasonal common cold to SARS and COVID-19. Of the 7  
29 human coronaviruses discovered to date, 3 emergent and severe human coronavirus strains  
30 (SARS-CoV, MERS-CoV, and SARS-CoV-2) have recently jumped to humans in the last 20  
31 years. The COVID-19 pandemic spawned by the emergence of SARS-CoV-2 in late 2019 has  
32 highlighted the importance for development of effective therapeutics to target emerging  
33 coronaviruses. Upon entry, the replicase genes of coronaviruses are translated and subsequently  
34 proteolytically processed by virus-encoded proteases. Of these proteases, nonstructural protein 5  
35 (nsp5, Mpro, or 3CLpro), mediates the majority of these cleavages and remains a key drug target  
36 for therapeutic inhibitors. Efforts to develop nsp5 active-site inhibitors for human coronaviruses  
37 have thus far been unsuccessful, establishing the need for identification of other critical and  
38 conserved non-active-site regions of the protease. In this study, we describe the identification of  
39 an essential, conserved horseshoe-shaped region in the nsp5 interdomain loop (IDL) of mouse  
40 hepatitis virus (MHV), a common coronavirus replication model. Using site-directed  
41 mutagenesis and replication studies, we show that several residues comprising this horseshoe-  
42 shaped region either fail to tolerate mutagenesis or were associated with viral temperature-  
43 sensitivity. Structural modeling and sequence analysis of these sites in other coronaviruses,  
44 including all 7 human coronaviruses, suggests that the identified structure and sequence of this  
45 horseshoe regions is highly conserved and may represent a new, non-active-site regulatory  
46 region of the nsp5 (3CLpro) protease to target with coronavirus inhibitors.

47

## 48 **Importance**

49

50 In December 2019, a novel coronavirus (SARS-CoV-2) emerged in humans and triggered a  
51 pandemic which has to date resulted in over 8 million confirmed cases of COVID-19 across  
52 more than 180 countries and territories (June 2020). SARS-CoV-2 represents the third emergent  
53 coronavirus in the past 20 years and the future emergence of new coronaviruses in humans  
54 remains certain. Critically, there remains no vaccine nor established therapeutics to treat cases of  
55 COVID-19. The coronavirus nsp5 protease is a conserved and indispensable virus-encoded  
56 enzyme which remains a key target for therapeutic design. However, past attempts to target the  
57 active site of nsp5 with inhibitors have failed stressing the need to identify new conserved non-  
58 active-site targets for therapeutic development. This study describes the discovery of a novel  
59 conserved structural region of the nsp5 protease of coronavirus mouse hepatitis virus (MHV)  
60 which may provide a new target for coronavirus drug development.

61

## 62 **Introduction**

63

64 Coronaviruses (CoVs) are enveloped, positive-strand RNA viruses which encode among the  
65 largest RNA virus genomes on the planet and infect a wide range of organisms including  
66 humans. To date, 7 human coronaviruses (HCoVs) have been identified, which include 4 HCoVs  
67 associated with seasonal common colds (HCoV-229E, HCoV-NL63, HCoV-OC43, and HCoV-  
68 HKU1) and 3 novel emerging coronaviruses associated with lower respiratory diseases and  
69 significant mortality (SARS-CoV, MERS-CoV, and SARS-CoV-2) (1). In December 2019, the  
70 first case of a novel coronavirus disease (COVID-19) was reported in Wuhan, China. Caused by

71 a new emerging human coronavirus, now called SARS-CoV-2, this coronavirus likely emerged  
72 from bats and triggered a current worldwide pandemic resulting in over 8 million infections and  
73 over 400,000 deaths at the time of this writing (June 2020) (2). To date, there remains no  
74 commercially available vaccine for human coronaviruses and exhaustive efforts globally are  
75 underway to rapidly produce vaccines and effective therapeutic options to prevent and treat  
76 human coronavirus infections.

77  
78 Coronaviruses encode positive-strand RNA (+ssRNA) genomes that range in size from 27 kb to  
79 32 kb and represent among the largest RNA genomes (1, 3). During coronavirus infections,  
80 attachment and fusion of the virus are triggered by the viral Spike attachment protein (4–6).  
81 Upon entry and uncoating, the replicase open-reading frames of the virus, which encode up to 16  
82 nonstructural proteins (nsps) are translated to form two variant polyproteins (pp1a and pp1ab)  
83 (**Fig. 1A**) (7–11) . These polyproteins must undergo proteolytic cleavage by virus-encoded  
84 proteases, papain-like protease(s) (PLPs) and the nonstructural protein 5 (nsp5), to yield the  
85 mature replication machinery of the virus (1, 12–14).

86  
87 Coronavirus protease nsp5 ( $M_{\text{pro}}$ ,  $3\text{CL}_{\text{pro}}$ ) is a cysteine protease which is conserved in both  
88 overall structure and function among all coronaviruses identified to date (13, 15–17). Since its  
89 initial discovery, nsp5 has continued to be a primary target for design of coronavirus inhibitors  
90 and therapeutics. Nsp5 consists of three domains with domains 1 and 2 forming a chymotrypsin-  
91 like fold housing the His-Cys catalytic dyad and active site and a more divergent third domain  
92 promoting stabilization of the chymotrypsin-like fold and mediating nsp5 dimerization, an  
93 important event to complete  $3\text{CL}_{\text{pro}}$  maturation processing (**Fig. 1C**) (18–21). Connecting



94 domains 2 and 3 is a 16 amino acid interdomain loop (IDL) which is a conserved feature in every  
95 nsp5 structure resolved to date (**Fig. 1B and 1D**). Several recent studies using X-ray structures  
96 have suggested that residues located in the IDL form parts of the S2 – S4 substrate binding  
97 pockets for several human nsp5 proteases (22–25). Furthermore, biochemical modeling and  
98 docking of active site inhibitors to SARS-CoV, MERS-CoV, and the recent SARS-CoV-2  
99 3CLpro proteases have suggested that engagement between residues found within the nsp5 IDL  
100 are critical for increasing affinity and inhibitory activity of active site inhibitors (24–26). Despite  
101 these biochemical studies and predictive models, there has yet to be any studies which have  
102 evaluated the function of the nsp5 IDL in a replicating virus. We hypothesize that the  
103 coronavirus nsp5 IDL represents an important structural and regulatory region of the protease.

104

105 In this study, we used site-directed mutagenesis to investigate how specific changes within the  
106 nsp5 IDL of mouse hepatitis virus (MHV), an established replication model for coronavirus  
107 study, impact overall virus replication (27). These studies provide the first detailed analysis of  
108 this conserved and important region of the nsp5 protease and may provide a new target for the  
109 development of coronavirus nsp5 inhibitors.

110

## 111 **Materials and Methods**

112

113 **Cells, viruses, and antibodies.** Recombinant wild-type (WT) mouse hepatitis virus (MHV)  
114 strain A59 (GenBank accession no. AY910861) was used as a wild-type virus control for the  
115 experiments described. Temperature-sensitive MHV nsp5 mutant virus S133A which was used  
116 as a temperature-sensitive control for efficiency of plating (EOP) analysis has been previously

117 described (28, 29). Virus experiments were performed in murine delayed brain tumor 9 (DBT-9)  
118 cells, which are naturally permissive to MHV-A59 infection, and baby hamster kidney cells  
119 which express the MHV receptor (BHK-R) under selection with 0.8 mg/ml of G418. Complete  
120 Dulbecco's Modified Eagle medium (DMEM, VWR) supplemented with 10% fetal bovine  
121 serum (FBS), 1% HEPES, and an antibiotic-antimycotic solution (Corning) containing penicillin,  
122 streptomycin, and amphotericin B, was used for growth of both DBT-9 and BHK-R cells. All  
123 biochemical experiments were carried out using rabbit polyclonal anti-nsp8 antisera previously  
124 described (29).

125

126 **Site-directed mutagenesis and recovery of MHV nsp5 IDL mutant viruses.** The MHV  
127 infectious clone (MHVic) reverse genetics system used for the attempted recovery of the nsp5  
128 IDL mutant viruses has been previously described by Yount *et al* (30). In brief, the nsp5 IDL  
129 mutations were engineered into the MHVic C fragment using a PCR-based approach with sense  
130 and antisense primers containing overlapping nucleotide changes corresponding to the desired  
131 amino acid changes in the nsp5 IDL. The MHVic C fragment sequences were all sequence  
132 confirmed prior to MHVic assembly, which involved the ligation of digested and gel purified  
133 cDNA fragments, *in vitro* transcription of the ligated cDNA (along with a N-gene containing  
134 cDNA) using an mMachine T7 transcription kit (Ambion), and subsequent electroporation into  
135 BHK-R cells. All virus recovery attempts were made at least 3 times and recovered viruses were  
136 expanded in DBT-9 cells and sequence confirmed before analysis.

137

138 **Viral replication assays and efficiency of plating (EOP) analysis.** To evaluate viral replication  
139 kinetics, DBT-9 cells were grown to near confluency (~90 - 100%) in 6-well plates prior to

140 infection with a virus multiplicity of infection (MOI) of 0.01 PFU/cell at either 37°C or 40°C.  
141 Throughout the replication time course, aliquots of virus were obtained and prewarmed media  
142 added back to ensure a constant volume. Virus titers were determined in duplicate by plaque  
143 assay on DBT-9 cells as previously described (29). Efficiency of plating (EOP) values were  
144 determined as the ratio of calculated titers by plaque assay at two different temperatures (40°C  
145 and 37°C) for the same aliquot of virus.

146

147 **Western blot analysis of nsp5 protease activity.** DBT-9 cells were infected at an MOI of 0.5  
148 with virus and cell lysates harvested in RIPA buffer (150 mM NaCl, 1% NP40, 0.5% Sodium  
149 deoxycholate, and 50 mM Tris pH 8.0) at 8 h p.i. Lysates were separated on a 4 – 15%  
150 polyacrylamide gel, transferred to a PVDF membrane, and blotted using an MHV nsp8-specific  
151 rabbit primary antibody, anti-nsp8 (VU123) (29). Western blots were resolved using an HRP-  
152 conjugated goat anti-rabbit secondary antibody and Western ECL substrate (Bio-Rad).

153

154 **Reversion analysis.** A plaque assay was performed at 40°C in DBT-9 cells. After visible  
155 plaques had formed, 10 plaques were picked and were individually expanded in T25 flasks of  
156 confluent DBT-9 cells. At approximately 70 – 90% syncytial involvement, the viral RNA was  
157 isolated and used for sequencing of the nsp5 coding region.

158

159 **Sequence and structural analyses.** The nsp5 IDL sequences of MHV-A59 and all 7 HCoV  
160 were aligned using CLUSTALW and analyzed for sequence conservation using WebLogo (31).  
161 Structural analysis of coronavirus nsp5 proteases was performed using PyMol (The PyMOL  
162 Molecular Graphics System, Version 2.0 Schrödinger, LLC.) using the following protease

163 structures available in the Protein Data Bank (PDB) or the Protein Modeling Data Base (PMDB):  
164 MHV-A59 (PDB 6JIJ), SARS-CoV (PDB 2Q6G), MERS-CoV (PDB 4YLU), SARS-CoV-2  
165 (PDB 6M2N), HCoV-229E (PDB 2ZU2), HCoV-NL63 (PDB 3TLO), HCoV-HKU1 (PDB  
166 3D23), and HCoV-OC43 (PMDB 0079872) (32–39).

167

168 **Statistical analyses.** Differences in viral replication were evaluated by fitting the replication  
169 curves to logistic growth models. The replication curve data were log transformed and a three-  
170 parameter model was fit to each temperature condition by least squares (40, 41). Parameter  
171 estimates and 95% confidence intervals were calculated for each mutant strain. The parameters  
172 evaluated were maximum slope (replication rate), inflection point (time to maximal replication),  
173 and maximum titer. Strain parameter estimates with non-overlapping 95% confidence intervals  
174 were significantly different ( $p < 0.05$ ). EOP data were analyzed using one-way ANOVA with viral  
175 strain as the main effect. Post-hoc analysis was conducted using Tukey's HSD to determine  
176 differences between strains. The data were log transformed to meet the assumptions of ANOVA  
177 but represented as non-transformed values for ease of interpretation. All statistical analysis were  
178 performed using JMP (SAS Institute, Cary, NC).

179

180

## 181 **Results**

182

### 183 **Site-directed mutagenesis of the MHV nsp5 IDL reveals several residues and IDL**

184 **modifications which fail to tolerate alanine-scanning mutagenesis.** The MHV nsp5

185 interdomain loop (IDL) is comprised of 16 amino acids from P184 to T199. To assess the roles

186 and contributions of the different residues and regions of the IDL to the nsp5 protease activity,  
187 we used a combination of alanine-scanning mutagenesis and C-terminal additions and deletions  
188 to initially mutate the MHV nsp5 IDL (**Table 1**). Of the 16 amino acids comprising the loop, a  
189 total of 8 virus mutants were successfully recovered (P184A, R186A, A188I, V190I, V191I,  
190 P194A, Q196A, and Y198A), 5 amino acid residues failed to permit virus recovery despite  
191 multiple attempts at rescue (Y185A, D187A, Q189A, Q192A, and T199A), and 3 amino acid  
192 residues were not evaluated (L193, V195, and D197). Among the unrecovered mutants,  
193 additional attempts to rescue using more conservative amino acid substitutions at residues D187  
194 (D187E) and Q192 (Q192N) were also unsuccessful. A total of four different C-terminal  
195 modifications were also attempted, which included 2 different C-terminal additions (a  
196 duplication of residues 197 - 199 and a duplication of residue 199) and 2 different C-terminal  
197 deletions (a deletion of residues 197 – 199 and a deletion of residue 199). All four of these C-  
198 terminal modifications to the nsp5 IDL failed to permit virus recovery.

199

## 200 **Analyses of plaque formation, replication, and protease activity reveal a novel**

201 **temperature-sensitive mutant in the MHV nsp5 IDL.** To evaluate the replication kinetics of  
202 each of the recovered MHV nsp5 IDL mutants, we infected confluent DBT-9 cells with an MOI  
203 of 0.01 of each of the IDL mutants and titered aliquots over a 24 h period (**Fig. 2A**). All 8  
204 recovered MHV IDL mutants exhibited indistinguishable replication kinetics compared to WT  
205 MHV. Previously, we described a total of 3 separate temperature-sensitive mutations (*ts*V148A,  
206 *ts*S133A, and *ts*F219L) in the MHV nsp5 protease whose phenotypes could be suppressed  
207 through long-distance second-site suppressor mutations (28, 29, 42). To evaluate whether any of  
208 the recovered MHV nsp5 IDL mutants may exhibit a temperature-sensitive phenotype, we

209 performed an efficiency of plating (EOP) analysis by comparing the titers of each IDL virus by  
210 plaque assay determined at a physiologic (37°C) and elevated temperature (40°C) (**Fig. 3A**).

211 Average EOP values were determined by the average ratios of titers at 40°C compared to 37°C,  
212 with those EOP values less than  $10^{-1}$  indicating a greater than 10-fold reduction in titers at the  
213 elevated temperature as being temperature-sensitive (*ts*). WT MHV exhibited an average EOP of  
214  $7.6 \times 10^{-1}$ . In contrast, previously described *ts* nsp5 mutant virus S133A, exhibited an average  
215 EOP of  $1.49 \times 10^{-4}$ , consistent with the EOP previously reported (29). Two separate MHV nsp5  
216 IDL mutants exhibited average EOP values less than  $10^{-1}$  and were significantly lower than WT  
217 MHV ( $p < 0.05$ ): P184A and R186A. Mutant P184A exhibited an average EOP of  $1.39 \times 10^{-2}$ . In  
218 contrast, IDL mutant R186A resulted in a much lower average EOP of  $7.6 \times 10^{-4}$ , which was not  
219 significantly different from the known *ts* mutant S133A. No other IDL mutants exhibited average  
220 EOPs significantly different from WT MHV. These data suggested that mutagenesis of two  
221 separate IDL residues (P184A and R186A) have resulted in novel temperature-sensitive  
222 phenotypes. To determine whether the observed differences in phenotype for IDL mutants  
223 P184A and R186A are due specifically to defects in nsp5 protease activity or some other long-  
224 distance effect, we performed a Western blot to evaluate the ability for the P184A and R186A  
225 nsp5 proteases to process the maturation cleavage of a downstream replicase (pp1ab) protein,  
226 nsp8, during virus replication (**Fig. 3B**). Lysates from WT-, P184A-, and R186A-infected DBT-9  
227 cells were compared for nsp5-mediated nsp8 processing at 37°C compared to 40°C. WT-MHV  
228 and P184A exhibited approximately equivalent levels (ratios of 1.08 and 0.99, respectively) of  
229 nsp8 protein detected at both temperatures. Consistent with its temperature-sensitive EOP, virus  
230 mutant R186A exhibited reduced nsp8 protein detected at 40°C compared to 37°C (ratio of 0.78)  
231 and when normalized to WT, exhibited an approximate 27% reduction in mature nsp8 protein

232 produced at the elevated temperature. These data demonstrate that MHV nsp5 IDL mutation  
233 R186A is associated with reduced nsp5 activity at 40°C, whereas no appreciable difference in  
234 processing at 40°C was detected for mutant P184A.

235

236 To assess the impact of elevated temperature on replication of the recovered MHV IDL mutant  
237 viruses, we repeated the MOI 0.01 replication assay in DBT-9 cells at 40°C (**Fig. 2B**). In contrast  
238 to replication at 37°C, the replication kinetics among the MHV IDL strains were far more  
239 variable, with most strains exhibiting a delay in logarithmic growth compared to WT MHV.

240 Mutant P184A, which had shown a temperature-sensitive EOP of  $1.39 \times 10^{-2}$ , failed to exhibit  
241 replication kinetics that were significantly different for wild-type or the other MHV IDL strains.

242 In contrast, mutant strain R186A showed significantly delayed replication kinetics to reach the  
243 maximal logarithmic growth rate ( $p < 0.05$ ) compared to WT MHV consistent with its

244 temperature-sensitive EOP of  $7.6 \times 10^{-4}$ . Collectively, these data indicate that mutant R186A  
245 exhibits both significantly reduced capacity to form plaques and delayed replication kinetics at  
246 the elevated temperature of 40°C compared to WT MHV.

247

248 **Reversion analysis of *ts* MHV nsp5 IDL mutant R186A reveals three compensatory second-**

249 **site suppressor mutations.** To identify potential interacting residues and novel regulatory

250 networks within the MHV nsp5 protease associated with residue R186, we performed reversion

251 analysis at 40°C by expanding and sequencing formed plaques at the inhibitory temperature (**Fig.**

252 **4A**). A total of 10 plaques were selected at expanded in T25 flasks for virus collection and

253 sequencing. Of these, 6 of these plaques resulted in the original R186A mutant virus while 3 of

254 these plaques yielded R186A in addition to one of each of three different second-site putative

255 suppressor mutations in nsp5: P184S, L141V, and L141I (**Fig. 4B**). Additional sequencing was  
256 performed on these 3 recovered viruses throughout the ORF1ab coding region and no other  
257 mutations were identified. The P184S mutation arose within the MHV nsp5 IDL, while residue  
258 L141 is located on the same loop housing the C145 catalytic residue of the active site.

259  
260 To evaluate whether the emergence of these second-site suppressor mutations aids in viral  
261 growth at 40°C, an EOP analysis was performed using these viruses at 37°C and 40°C (**Fig. 4C**).  
262 Consistent with earlier analysis, the R186A IDL mutant exhibited a temperature-sensitive and  
263 significantly reduced EOP ( $1.56 \times 10^{-3}$ ) compared to WT MHV (0.60) ( $p < 0.001$ ). However, all 3  
264 second-site suppressor mutant viruses (R186A/P184S, R186A/L141V, and R186A/L141I)  
265 resulted in indistinguishable EOP values (0.62, 0.78, and 0.33, respectively) from WT. These  
266 data collectively demonstrate that the addition of the second-site suppressor mutations was able  
267 to compensate for the initial defects in plaque formation associated with the primary R186A IDL  
268 mutation.

269  
270 **The nsp5 IDL contains a structurally-conserved novel horseshoe region in the N-terminal**  
271 **region of the loop of human coronaviruses SARS-CoV, MERS-CoV, and SARS-CoV-2.** To  
272 understand the structure and function of the IDL, we compared available crystal structures of  
273 human coronaviruses with MHV. To date, 6 of the 7 human coronavirus nsp5 proteases have  
274 been crystallized and resolved. We aligned these crystal structures along with MHV nsp5 and a  
275 modelled structure of HCoV-OC43 (**Fig. 5A**). Consistent with earlier studies, there was a high  
276 degree of conservation among domains 1 and 2 for all 8 of the proteases evaluated (most notably  
277 in and around the protein's active site) (42). In contrast, domain 3 exhibited far more structural



278 variability. The nsp5 IDL structure showed a high degree of structural similarity throughout  
279 including around a horseshoe shaped region in the N-terminus of the loop forming the inner and  
280 bottom part of the binding pocket for residues P2 – P5 of the substrate (**Fig. 5A and B**).

281 Modeling using the crystal structure of SARS-CoV-2, residues D187 and T188 formed a distinct  
282 pocket in and around the P2 residue of Leu, residues T188 and Q189 establish the back wall of  
283 the P3 binding pocket, and residues Q189, T190, and Q192 are responsible for forming the back  
284 (Q189 and T190) and base (Q192) of the P4 and P5 binding pockets.

285  
286 Among the MHV IDL mutants which failed to rescue were D187A, Q189A, and Q192A. Amino  
287 acid residues D187 and Q192 are structurally conserved in all sequenced nsp5 proteases to date  
288 (**Fig. 1B**). Both D187 and Q192 are located in a conserved horseshoe-shaped region in the N-  
289 terminus of the IDL. The D187 side chain projects from the top of the horseshoe-shaped region  
290 towards domain 1 and the protease active site and forms the inner wall pocket for the P2 binding  
291 site. In an alignment of the D187 residues of MHV, SARS-CoV, MERS-CoV, and SARS-CoV-  
292 2, the positioning and orientation of the side chain are highly conserved with predicted polar  
293 contacts with two additional highly conserved residues R40 (which is immediately adjacent to  
294 the catalytic H41) and Y54 (**Fig. 5C**). The Q192 side chain is conserved in its positioning  
295 towards the center of the horseshoe-shaped region where it shares predicted polar contacts with  
296 several other IDL residues including A188 and R186 (in MHV), R186 and R188 (in SARS-CoV-  
297 2), K191 (in MERS-CoV), and T190 (in SARS-CoV) (**Fig. 5D**). The coordination of Q192 with  
298 the backbone amino and carboxyl groups of R186 is conserved across all 4 viruses suggesting a  
299 potential role for the newly-identified temperature-sensitive residue. Collectively, these data

300 indicate an important role of the horseshoe-shaped region of the IDL in forming the substrate  
301 binding pocket and stabilizing core of domains 1 and 2.

302

303

## 304 **Discussion**

305

306 The coronavirus nsp5 protease remains a leading target for the development of inhibitor drug  
307 development. Over the last two decades, there have now been 3 emergent coronavirus outbreaks  
308 (including the current SARS-CoV-2 pandemic) which collectively highlight both the importance  
309 for rapid development of effective therapeutics for the treatment of COVID-19, but also the need  
310 to be prepared for potential future coronavirus outbreaks. In the present study, we evaluated the  
311 structure and function of the nsp5 protease IDL, a poorly studied and structurally conserved  
312 region of the protease. Using site-directed mutagenesis, we demonstrated that some residues and  
313 regions of the protease were capable of accepting mutations without apparent defects in viral  
314 replication, however a number of residues mostly located within a horseshoe-shaped region in  
315 the N-terminus of the protease either failed to permit virus recovery or resulted in a viral  
316 temperature-sensitivity. Of the 16 amino acid residues comprising the loop, we were able to  
317 successfully recover viral mutants at 8 different locations (**Table 1**).

318

319 Despite the overall structural conservation of the entirety of the loop, the majority of these  
320 mutations resulted in no apparent defects in viral replication compared to WT. A few of these  
321 residues (A188, V190, and V191) with no apparent viral defects are known to form the basis of  
322 part of the P3 - P5 substrate binding pockets of the protease (24, 26). Yet, compared to the rest of

323 the IDL, these residue positions showed among the least sequence conservation (**Figure 1B**),  
324 which may explain the plasticity with which these residues could tolerate mutagenesis as well as  
325 cleavage site variability among coronaviruses (16). Similarly, more C-terminal residues P194,  
326 Q196, and Y198 are also found in more variable sequence locations within the IDL. Collectively,  
327 these 8 residue positions may simply represent flexible linker residues than serving additional  
328 structural supportive or enzymatic roles within the protease.

329

330 Residues P184 and R186, while rescued when mutated to alanine amino acids, exhibited reduced  
331 capacity to form plaques at 40°C. P184 is found at a bend leading into the horseshoe shaped  
332 region of the IDL and may be responsible for helping stabilize the N-terminal anchor of the loop  
333 within domain 2. Replication analysis and Western blots of the P184A mutant virus failed to  
334 show significant differences from WT MHV, however the selection of a P184S mutation in  
335 reversion analysis of R186A may suggest that these two residues represent stabilizing and  
336 interacting nodes within the protease (**Figure 4B**). We previously described 3 different  
337 temperature-sensitive mutations in MHV-A59 (S133A, V148A, and F219L) which all shared  
338 overlapping compensatory second-site suppressor mutations (28, 29, 42). All 3 viruses selected  
339 for an H134Y mutation, while the temperature-sensitive V148A mutation selected for an S133N  
340 mutation. Furthermore, second-site mutations were identified for F219L which were located  
341 greater than 20 Å away from the initial mutation. P184A is located on an adjacent loop in  
342 domain 2 to both S133 and H134 (less than 6 Å) in distance (not shown). MHV viral mutant  
343 R186A was found to exhibit delayed replication kinetics (**Figure 2**), reduced capacity to form  
344 plaques (**Figure 3**), and reduced nsp5-mediated proteolytic processing at the elevated  
345 temperature of 40°C, consistent with a temperature-sensitive phenotype (**Figure 3**). Perhaps

346 surprising, the R186 residue position was the most variable and least conserved structurally  
347 among all 7 HCoV-229E evaluated (**Figure 1B**). Structural analysis of the MHV, SARS-CoV, SARS-  
348 CoV-2, and MERS-CoV revealed that the side chain of the 100% conserved Q192 appears to  
349 form conserved polar interactions with the backbone amino and carboxyl termini of the residue  
350 186 position (**Figure 5D**). These data may suggest that Q192 is stabilized within the horseshoe  
351 shaped region of the IDL through anchoring to the residue 186 position immediately across from  
352 it. In addition, the selection of a compensatory change in the P184 position during reversion  
353 analysis would support a role of both the 184 and 186 residue positions in mediating loop  
354 stabilization. In addition to a P184S second-site suppressor mutation, two additional mutations  
355 (L141V and L141I) were also each associated with compensating for the R186A temperature-  
356 sensitivity (**Figure 4B**). Residue L141 is part of a well-characterized 3-residue loop (S139 –  
357 L141) that forms part of the S1 subsite of the protease and transitions into a short  $3_{10}$ -helix  
358 triggering an inactive conformation that has been shown in SARS-CoV serving as a putative  
359 enzymatic switch from inactive to active conformations. Introducing a L141T mutation into an  
360 inactive SARS-CoV triple mutant (G11A/R298A/Q299A) resulting restoration of nsp5 protease  
361 activity (20, 43). These earlier studies suggest that L141, helps regulate substrate accessibility to  
362 the active site. I141, one of the residues selected for by R186A in MHV, is the wild-type residue  
363 in two different  $\alpha$ -CoVs: HCoV-229E and HCoV-NL63. The selection for a mutation at this  
364 residue position to restore full activity of R186A at 40°C may indicate that the protease  
365 experienced instability in or around the active site and substrate binding pocket of the protease.  
366  
367 There were 5 IDL residues which failed to permit MHV mutant virus rescue (Y185A, D187A/E,  
368 Q189A, Q192A/N, and T199A) (**Table 1**). Residue T199, while far more variable, is located at

369 the C-terminal end of the IDL and efforts to modify this region by either additions or deletions  
370 were not tolerated. These data may suggest an important role of T199 in stabilizing the base and  
371 positioning of the IDL. Comparatively, four of these residue positions (185, 187, 189, and 192)  
372 show a high level of amino acid conservation with two of these residues (D187 and Q192) being  
373 100% conserved across all known coronavirus nsp5 protease sequences to date (**Figure 1B**). All  
374 four of these residues are found within a conserved horseshoe-shaped region within the N-  
375 terminus of the nsp5 IDL. We propose that this horseshoe-shaped region is a critical region of  
376 the protease for both structure and function based on the following observations: (1) A total of 6  
377 different residues either failed to tolerate mutagenesis (Y185, D187, Q189, and Q192) or resulted  
378 in altered phenotypes under elevated temperatures (P184 and R186); (2) Biochemical analysis  
379 and predictive structural modeling indicates that multiple residues including D187 – Q192 are  
380 involved in forming the P2 – P5 substrate binding pockets; (3) Predicted polar interactions  
381 shown here between D187 and conserved domain 1 residues R40 and Y54 appear to stabilize the  
382 positioning of the loop which is conserved in all nsp5 protease structures to date; and (4)  
383 Reversion analysis of temperature-sensitive IDL mutant R186A selected for two separate  
384 mutations at residue L141, which is known to regulate substrate accessibility to the active site  
385 and enzymatic activation. Previous biochemical analyses have suggested that next-generation  
386 coronavirus nsp5 inhibitors need to coordinate with the P2 – P5 substrate binding site to increase  
387 affinity and efficacy. The IDL data presented here support this idea and highlights a novel,  
388 conserved region found in all 7 HCoV to date, including the recent emerging and pandemic  
389 SARS-CoV-2.

390

391

392 **Acknowledgements**

393

394 This work was supported by a grant from the Holcomb Awards Committee (HAC) of Butler

395 University (C.C.S.) and funding and support from the Butler University Department of

396 Biological Sciences (C.C.S.). We would like to especially thank Dia Beachboard, Lindsay

397 Maxwell, and the other members of the Stobart and Denison Labs for their support and guidance

398 throughout this multiyear endeavor.

399

400

401

402

403

404

405

406

407

408

409

410

411

412

413

414

415

416

417

418

419

420

421

422

423

424 **References**

425

426 1. Fehr AR, Perlman S. 2015. Coronaviruses: an overview of their replication and pathogenesis.

427 *Methods Mol Biol* 1282:1–23.

428 2. Zhou P, Yang X-L, Wang X-G, Hu B, Zhang L, Zhang W, Si H-R, Zhu Y, Li B, Huang C-L,

429 Chen H-D, Chen J, Luo Y, Guo H, Jiang R-D, Liu M-Q, Chen Y, Shen X-R, Wang X, Zheng

430 X-S, Zhao K, Chen Q-J, Deng F, Liu L-L, Yan B, Zhan F-X, Wang Y-Y, Xiao G-F, Shi Z-L.

431 2020. A pneumonia outbreak associated with a new coronavirus of probable bat origin.

432 *Nature* 579:270–273.

433 3. Perlman S, Netland J. 2009. Coronaviruses post-SARS: update on replication and

434 pathogenesis. *Nat Rev Microbiol* 7:439–450.

435 4. Bosch BJ, van der Zee R, de Haan CAM, Rottier PJM. 2003. The Coronavirus Spike Protein

436 Is a Class I Virus Fusion Protein: Structural and Functional Characterization of the Fusion

437 Core Complex. *J Virol* 77:8801–8811.

438 5. Collins AR, Knobler RL, Powell H, Buchmeier MJ. 1982. Monoclonal antibodies to murine

439 hepatitis virus-4 (strain JHM) define the viral glycoprotein responsible for attachment and

440 cell--cell fusion. *Virology* 119:358–371.

441 6. Li F. 2016. Structure, Function, and Evolution of Coronavirus Spike Proteins. *Annu Rev*

442 *Virol* 3:237–261.

443 7. Brierley I, Digard P, Inglis SC. 1989. Characterization of an efficient coronavirus ribosomal

444 frameshifting signal: requirement for an RNA pseudoknot. *Cell* 57:537–547.

- 445 8. Baranov PV, Henderson CM, Anderson CB, Gesteland RF, Atkins JF, Howard MT. 2005.  
446 Programmed ribosomal frameshifting in decoding the SARS-CoV genome. *Virology*  
447 332:498–510.
- 448 9. Bonilla PJ, Gorbalenya AE, Weiss SR. 1994. Mouse hepatitis virus strain A59 RNA  
449 polymerase gene ORF 1a: heterogeneity among MHV strains. *Virology* 198:736–740.
- 450 10. Bredenbeek PJ, Pachuk CJ, Noten AF, Charité J, Luytjes W, Weiss SR, Spaan WJ. 1990.  
451 The primary structure and expression of the second open reading frame of the polymerase  
452 gene of the coronavirus MHV-A59; a highly conserved polymerase is expressed by an  
453 efficient ribosomal frameshifting mechanism. *Nucleic Acids Res* 18:1825–1832.
- 454 11. Lee HJ, Shieh CK, Gorbalenya AE, Koonin EV, La Monica N, Tuler J, Bagdzhadzhyan A,  
455 Lai MM. 1991. The complete sequence (22 kilobases) of murine coronavirus gene 1  
456 encoding the putative proteases and RNA polymerase. *Virology* 180:567–582.
- 457 12. Lu Y, Lu X, Denison MR. 1995. Identification and characterization of a serine-like  
458 proteinase of the murine coronavirus MHV-A59. *J Virol* 69:3554–3559.
- 459 13. Ziebuhr J, Snijder EJ, Gorbalenya AE. 2000. Virus-encoded proteinases and proteolytic  
460 processing in the Nidovirales. *J Gen Virol* 81:853–879.
- 461 14. Mielech AM, Chen Y, Mesecar AD, Baker SC. 2014. Nidovirus papain-like proteases:  
462 multifunctional enzymes with protease, deubiquitinating and deISGylating activities. *Virus*  
463 *Res* 194:184–190.



- 464 15. Hegyi A, Ziebuhr J. 2002. Conservation of substrate specificities among coronavirus main  
465 proteases. *Journal of General Virology* 83:595–599.
- 466 16. Grum-Tokars V, Ratia K, Begaye A, Baker SC, Mesecar AD. 2008. Evaluating the 3C-like  
467 protease activity of SARS-Coronavirus: recommendations for standardized assays for drug  
468 discovery. *Virus Res* 133:63–73.
- 469 17. Stobart CC, Denison MR. 2013. CHAPTER 546: CORONAVIRUS PICORNAIN-LIKE  
470 CYSTEINE PROTEINASE HANDBOOK OF PROTEOLYTIC ENZYMES, 3RD ed.
- 471 18. Anand K, Ziebuhr J, Wadhwani P, Mesters JR, Hilgenfeld R. 2003. Coronavirus main  
472 proteinase (3CLpro) structure: basis for design of anti-SARS drugs. *Science* 300:1763–1767.
- 473 19. Shi J, Song J. 2006. The catalysis of the SARS 3C-like protease is under extensive regulation  
474 by its extra domain. *FEBS J* 273:1035–1045.
- 475 20. Shi J, Sivaraman J, Song J. 2008. Mechanism for controlling the dimer-monomer switch and  
476 coupling dimerization to catalysis of the severe acute respiratory syndrome coronavirus 3C-  
477 like protease. *J Virol* 82:4620–4629.
- 478 21. Chen S, Jonas F, Shen C, Hilgenfeld R, Higenfeld R. 2010. Liberation of SARS-CoV main  
479 protease from the viral polyprotein: N-terminal autocleavage does not depend on the mature  
480 dimerization mode. *Protein Cell* 1:59–74.
- 481 22. Muramatsu T, Takemoto C, Kim Y-T, Wang H, Nishii W, Terada T, Shirouzu M, Yokoyama  
482 S. 2016. SARS-CoV 3CL protease cleaves its C-terminal autoprocessing site by novel  
483 subsite cooperativity. *Proc Natl Acad Sci U S A* 113:12997–13002.

- 484 23. Jo S, Kim S, Shin DH, Kim M-S. 2019. Inhibition of SARS-CoV 3CL protease by  
485 flavonoids. *J Enzyme Inhib Med Chem* 35:145–151.
- 486 24. Gimeno A, Mestres-Truyol J, Ojeda-Montes MJ, Macip G, Saldivar-Espinoza B, Cereto-  
487 Massagué A, Pujadas G, Garcia-Vallvé S. 2020. Prediction of Novel Inhibitors of the Main  
488 Protease (M-pro) of SARS-CoV-2 through Consensus Docking and Drug Reposition. 11.  
489 *International Journal of Molecular Sciences* 21:3793.
- 490 25. Zhang L, Lin D, Sun X, Curth U, Drosten C, Sauerhering L, Becker S, Rox K, Hilgenfeld R.  
491 2020. Crystal structure of SARS-CoV-2 main protease provides a basis for design of  
492 improved  $\alpha$ -ketoamide inhibitors. *Science* 368:409–412.
- 493 26. Ohnishi K, Hattori Y, Kobayashi K, Akaji K. 2019. Evaluation of a Non-Prime Site  
494 Substituent and Warheads Combined With a Decahydroisoquinolin Scaffold as a SARS 3CL  
495 Protease Inhibitor. *Bioorganic & medicinal chemistry. Bioorg Med Chem*.
- 496 27. Weiss SR, Leibowitz JL. 2011. Coronavirus pathogenesis. *Adv Virus Res* 81:85–164.
- 497 28. Sparks JS, Donaldson EF, Lu X, Baric RS, Denison MR. 2008. A novel mutation in murine  
498 hepatitis virus nsp5, the viral 3C-like proteinase, causes temperature-sensitive defects in viral  
499 growth and protein processing. *J Virol* 82:5999–6008.
- 500 29. Stobart CC, Lee AS, Lu X, Denison MR. 2012. Temperature-sensitive mutants and  
501 revertants in the coronavirus nonstructural protein 5 protease (3CLpro) define residues  
502 involved in long-distance communication and regulation of protease activity. *J Virol*  
503 86:4801–4810.

- 504 30. Yount B, Denison MR, Weiss SR, Baric RS. 2002. Systematic assembly of a full-length  
505 infectious cDNA of mouse hepatitis virus strain A59. *J Virol* 76:11065–11078.
- 506 31. Crooks GE, Hon G, Chandonia J-M, Brenner SE. 2004. WebLogo: a sequence logo  
507 generator. *Genome Res* 14:1188–1190.
- 508 32. Cui W, Cui S, Chen C, Chen X, Wang Z, Yang H, Zhang L. 2019. The crystal structure of  
509 main protease from mouse hepatitis virus A59 in complex with an inhibitor. *Biochemical and*  
510 *Biophysical Research Communications* 511:794–799.
- 511 33. Xue X, Yu H, Yang H, Xue F, Wu Z, Shen W, Li J, Zhou Z, Ding Y, Zhao Q, Zhang XC,  
512 Liao M, Bartlam M, Rao Z. 2008. Structures of Two Coronavirus Main Proteases:  
513 Implications for Substrate Binding and Antiviral Drug Design. *Journal of Virology* 82:2515–  
514 2527.
- 515 34. Tomar S, Johnston ML, John SES, Osswald HL, Nyalapatla PR, Paul LN, Ghosh AK,  
516 Denison MR, Mesecar AD. 2015. Ligand-induced Dimerization of Middle East Respiratory  
517 Syndrome (MERS) Coronavirus nsp5 Protease (3CLpro) Implications for nsp5 Regulation  
518 and the Development of Antivirals. *J Biol Chem* 290:19403–19422.
- 519 35. Su H, Yao S, Zhao W, Li M, Liu J, Shang W, Xie H, Ke C, Gao M, Yu K, Liu H, Shen J,  
520 Tang W, Zhang L, Zuo J, Jiang H, Bai F, Wu Y, Ye Y, Xu Y. 2020. Discovery of baicalin  
521 and baicalein as novel, natural product inhibitors of SARS-CoV-2 3CL protease in vitro.  
522 bioRxiv 2020.04.13.038687.
- 523 36. Lee C-C, Kuo C-J, Ko T-P, Hsu M-F, Tsui Y-C, Chang S-C, Yang S, Chen S-J, Chen H-C,  
524 Hsu M-C, Shih S-R, Liang P-H, Wang AH-J. 2009. Structural Basis of Inhibition

- 525 Specificities of 3C and 3C-like Proteases by Zinc-coordinating and Peptidomimetic  
526 Compounds. *J Biol Chem* 284:7646–7655.
- 527 37. Wang F, Chen C, Tan W, Yang K, Yang H. 2016. Structure of Main Protease from Human  
528 Coronavirus NL63: Insights for Wide Spectrum Anti-Coronavirus Drug Design. *Sci Rep* 6.
- 529 38. Zhao Q, Li S, Xue F, Zou Y, Chen C, Bartlam M, Rao Z. 2008. Structure of the main  
530 protease from a global infectious human coronavirus, HCoV-HKU1. *J Virol* 82:8647–8655.
- 531 39. Berry M, Fielding B, Gamiieldien J. 2015. Human coronavirus OC43 3CL protease and the  
532 potential of ML188 as a broad-spectrum lead compound: Homology modelling and  
533 molecular dynamic studies. *BMC Struct Biol* 15:8.
- 534 40. Zwietering MH, Jongenburger I, Rombouts FM, van 't Riet K. 1990. Modeling of the  
535 Bacterial Growth Curve. *Appl Environ Microbiol* 56:1875–1881.
- 536 41. Tjørve KMC, Tjørve E. 2017. The use of Gompertz models in growth analyses, and new  
537 Gompertz-model approach: An addition to the Unified-Richards family. *PLoS One* 12.
- 538 42. Stobart CC, Sexton NR, Munjal H, Lu X, Molland KL, Tomar S, Mesecar AD, Denison MR.  
539 2013. Chimeric exchange of coronavirus nsp5 proteases (3CLpro) identifies common and  
540 divergent regulatory determinants of protease activity. *J Virol* 87:12611–12618.
- 541 43. Li C, Teng X, Qi Y, Tang B, Shi H, Ma X, Lai L. 2016. Conformational Flexibility of a  
542 Short Loop near the Active Site of the SARS-3CLpro is Essential to Maintain Catalytic  
543 Activity. *Sci Rep* 6:20918.

544  
545

546 **Figure Legends**

547

548 **Figure 1: MHV nsp5 (3CLpro)-mediated polyprotein processing and conservation of**  
549 **structure and sequence of the nsp5 IDL. (A)** Upon entry of the +ssRNA genome of MHV into  
550 cells, the first open-reading frame (ORF1) encoding the replicase machinery is translated into  
551 two variant polyproteins (pp1a and pp1ab) which undergo maturation cleavages by 3 viral  
552 encoded proteases (papain-like proteases 1 (PLP1, black) and 2 (PLP2, blue) and nsp5 (3CLPro,  
553 red)). The cleavage sites are marked by arrows with colors corresponding to the protease  
554 mediating each cleavage. **(B)** Sequence alignment (top) and sequence logo (bottom) of the MHV  
555 and 7 HCoV nsp5 IDL sequences. Residues D187 and Q192 are 100% conserved (in bold) in all  
556 known coronavirus nsp5 sequences identified to date. The sequence logo was generated using  
557 WebLogo with amino acid conservation represented in the height of each letter and the overall  
558 height of the amino acids represented in the position (31). **(C)** Crystal structure of an MHV nsp5  
559 monomer and dimer (PDB - 6JII) with domains 1 (D1, red), 2 (D2, blue), 3 (D3, gray) and the  
560 D2-D3 IDL (green) color coded. **(D)** Expanded view of the MHV nsp5 IDL with the individual  
561 amino acids comprising the loop labeled along with the H41-C145 catalytic dyad residues.

562

563 **Figure 2: Replication analysis of MHV nsp5 IDL mutant viruses at 37°C (A) and 40°C (B).**

564 Confluent monolayers of DBT-9 cells were infected with an MOI = 0.01. Aliquots of viral  
565 supernatant were obtained over 24 h post-infection (h p.i.) and viral titers were determined by  
566 plaque assay in DBT-9 cells at 37°C. Data points in each graph represent the average titer  $\pm$  SEM  
567 for 2 experimental replicates **(A)** or 5 experimental replicates **(B)**. The limit of detection is  
568 shown by a black dashed line and titers at or below the limit of detection were reported as equal

569 to the limit of detection. Statistical analyses were performed to compare the time to reach the  
570 maximal replication rate with statistically significant times compared to WT indicated (\*\*\*,  
571  $p < 0.05$ ).

572

573 **Figure 3: Efficiency of plating (EOP) and Western blot analysis of MHV nsp5 IDL mutant**

574 **viruses. (A)** Plaque assays were performed in confluent monolayers of DBT-9 to determine the  
575 capacity of each virus to form plaques at 37°C and 40°C. The efficiency of plating (EOP) was  
576 determined as the ratio of titers at 40°C to 37°C for an identical stock. The data shown reflect the  
577 average EOP  $\pm$  SEM (N = 3). Significant differences from WT are indicated by asterisks (\*\*\*,  
578  $p < 0.05$ , one-way ANOVA). **(B)** A Western blot was performed using mock or virus-infected  
579 lysates (WT, P184A, and R186A) which were harvested 8 h p.i. from DBT-9 cells infected at an  
580 MOI = 0.5. The protein lysates were resolved by SDS-PAGE, transferred to a PVDF membrane,  
581 and blotted for mature nsp8 (which undergoes maturation cleavage mediated by nsp5 protease)  
582 using anti-nsp8 antisera (VU123). Molecular weight markers are shown to the left of the bands.  
583 The average nsp8 band intensities (N = 2) were quantified using ImageJ and the ratios of nsp8  
584 detected at 40°C to 37°C were reported for each virus as well as when normalized to the ratio for  
585 WT MHV. The two panels of the Western blot shown are from the same gel at the same  
586 exposure with irrelevant bands cropped out.

587

588 **Figure 4: Reversion analysis of MHV nsp5 IDL mutant virus R186A. (A)** Confluent

589 monolayers of DBT-9 cells were infected with serially diluted mutant R186A for plaque  
590 formation at 40°C. A total of 10 plaques were picked and virus expanded at 40°C in T25 (25  
591 cm<sup>2</sup>) flasks until approximately 30 – 50% involvement in syncytia. Viral RNA was isolated and

592 sequencing performed throughout the ORF1ab replicase gene region. **(B)** Locations of recovered  
593 second-site revertant residues relative to the initial R186A mutation. **(C)** Plaque assays were  
594 performed in confluent monolayers of DBT-9 to determine the efficiency of plating (EOP) using  
595 titers at 40°C to 37°C for an identical stock. The data shown reflect the average EOP  $\pm$  SEM (N  
596 = 2).

597

598 **Figure 5: Structural analysis of the nsp5 IDL of human coronaviruses.** **(A)** A ribbon overlay  
599 of nsp5 proteases of MHV (PDB 6JIJ) and the 7 HCoV's: SARS-CoV (PDB 2Q6G), MERS-CoV  
600 (PDB 4YLU), SARS-CoV-2 (PDB 6M2N), HCoV-229E (PDB - 2ZU2), HCoV-HKU1 (PDB –  
601 3D23), HCoV-NL63 (PDB-3TLO), and the modeled structure of HCoV-OC43 (PM0079872)  
602 with a peptide encoding a SARS-CoV nsp5 autocleavage sequence (TSAVLQ↓SGFRKM)  
603 shown in black bound in the active site (32–39). **(B)** Modeling of the IDL-region of the substrate  
604 binding pocket with P2 – P5 residues labeled and the surface of SARS-CoV-2 nsp5 shown with  
605 contributing IDL residues D187 – Q192 identified. **(C and D)** Overlay of MHV, SARS-CoV,  
606 SARS-CoV-2, and MERS-CoV structures at the conserved MHV D187 (C) and Q192 (D)  
607 residues with the catalytic dyad H41 and C145 residues labeled. Predicted polar contacts  
608 between Q192 and other residues of the IDL are shown. SARS-CoV has an additional and  
609 unique predicted polar interaction with T190 (shown in red). All structures and modeling were  
610 performed with PyMol.

611

612

613

614

615

616

617

618

619 **Tables**  
620

| <b>MHV IDL Residue(s)</b> | <b>Virus Mutant Recovered</b> | <b>Virus Mutant Unrecovered</b> |
|---------------------------|-------------------------------|---------------------------------|
| <b>Pro184</b>             | P184A                         |                                 |
| <b>Tyr185</b>             |                               | Y185A                           |
| <b>Arg186</b>             | R186A                         |                                 |
| <b>Asp187</b>             |                               | D187A, D187E                    |
| <b>Ala188</b>             | A188I                         |                                 |
| <b>Gln189</b>             |                               | Q189A                           |
| <b>Val190</b>             | V190I                         |                                 |
| <b>Val191</b>             | V191I                         |                                 |
| <b>Gln192</b>             |                               | Q192A, Q192N                    |
| <b>Leu193</b>             |                               |                                 |
| <b>Pro194</b>             | P194A                         |                                 |
| <b>Val195</b>             |                               |                                 |
| <b>Gln196</b>             | Q196A                         |                                 |
| <b>Asp197</b>             |                               |                                 |
| <b>Tyr198</b>             | Y198A                         |                                 |
| <b>Thr199</b>             |                               | T199A                           |
| <b>C-term Insertions</b>  |                               | D197-T199 Ins, T199 Ins         |
| <b>C-term Deletions</b>   |                               | $\Delta$ 197-199, $\Delta$ 199  |

621  
622  
623 **Table 1: Site-directed Mutagenesis of the MHV nsp5 IDL.** Mutations were introduced and  
624 mutant virus recoveries attempted throughout the MHV nsp5 IDL using a reverse genetics  
625 system (30). Viruses which were recovered and those that did not permit recovery are described.  
626 Recovered viruses were sequence confirmed. Virus mutants which did not recover were  
627 attempted at least 3 times.

628  
629  
630  
631  
632



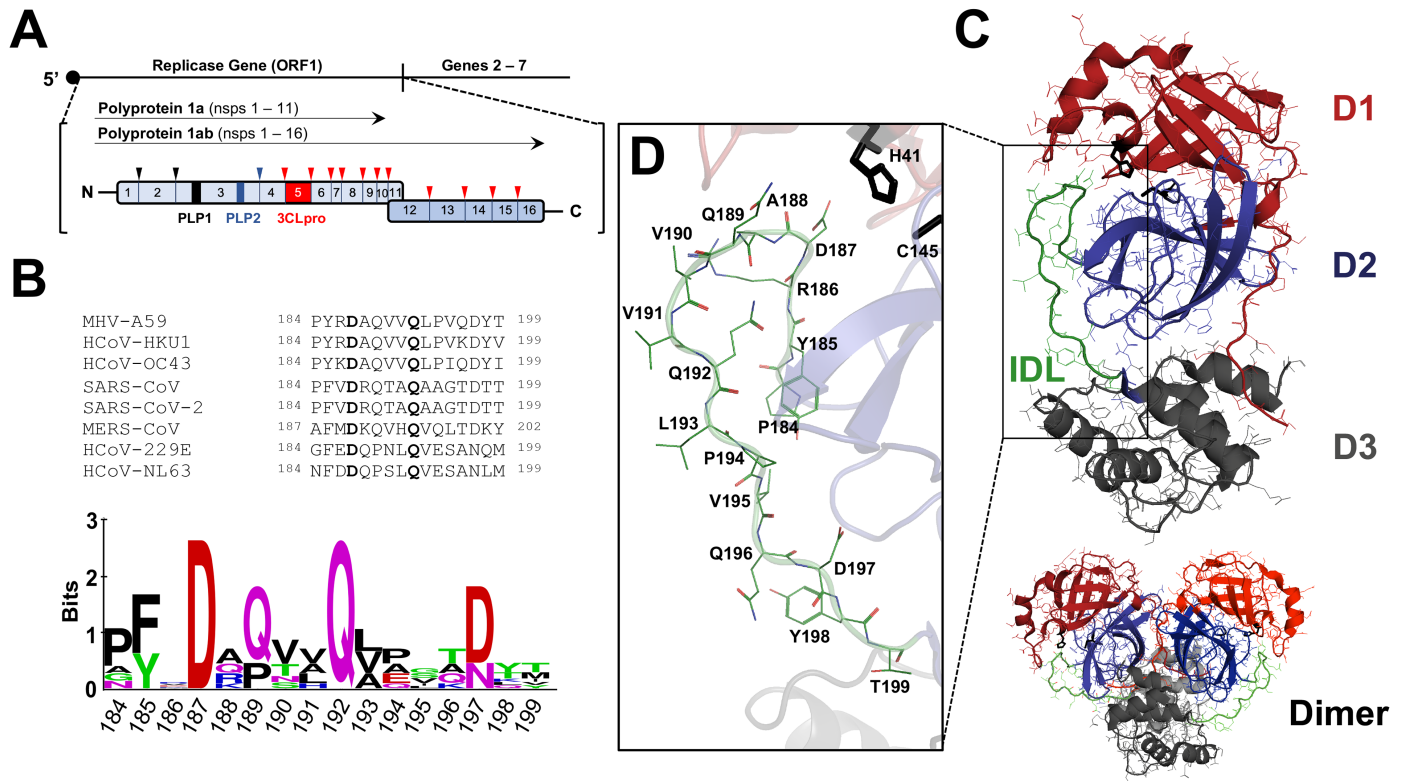

**Figure 1**

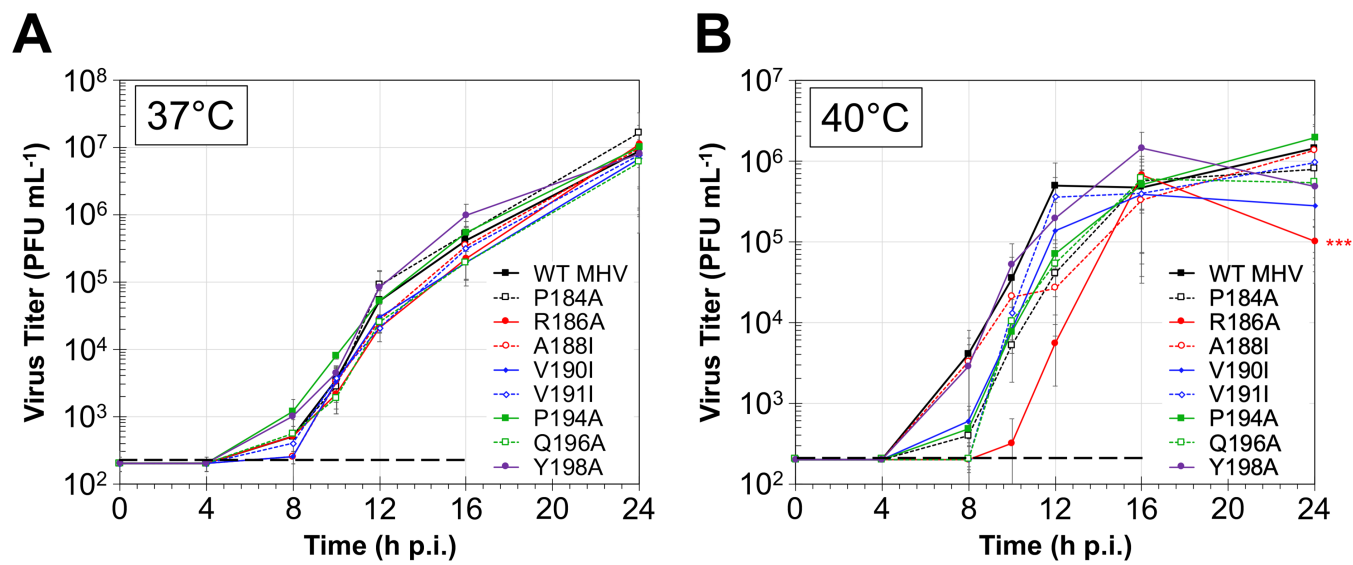

**Figure 2**

**A**

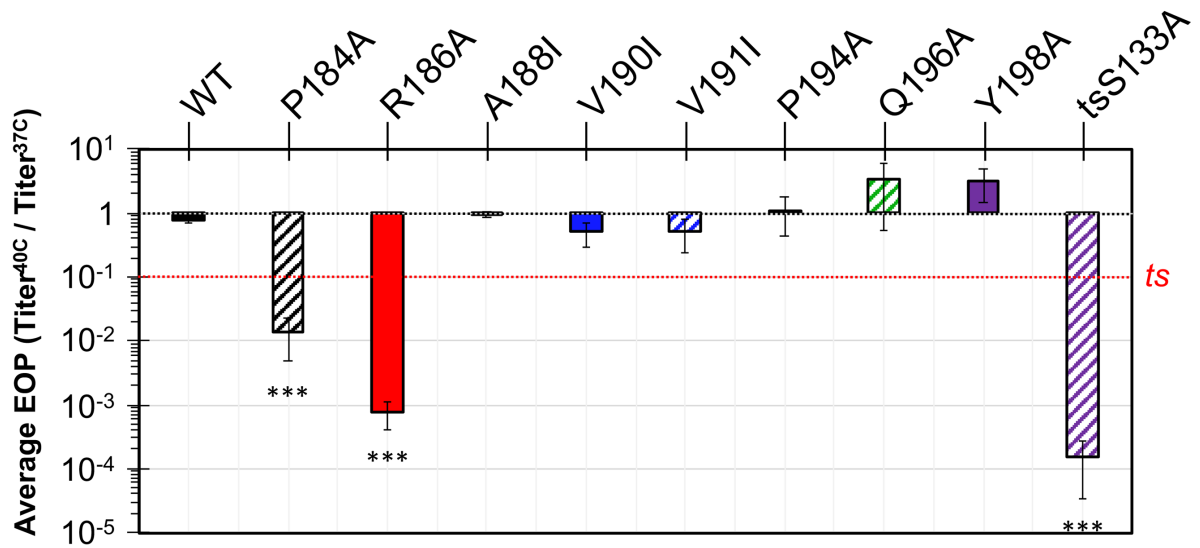

**B**

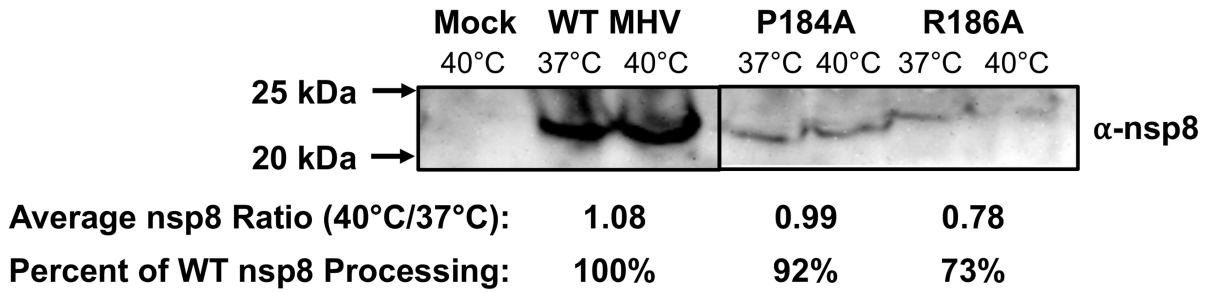

**Figure 3**

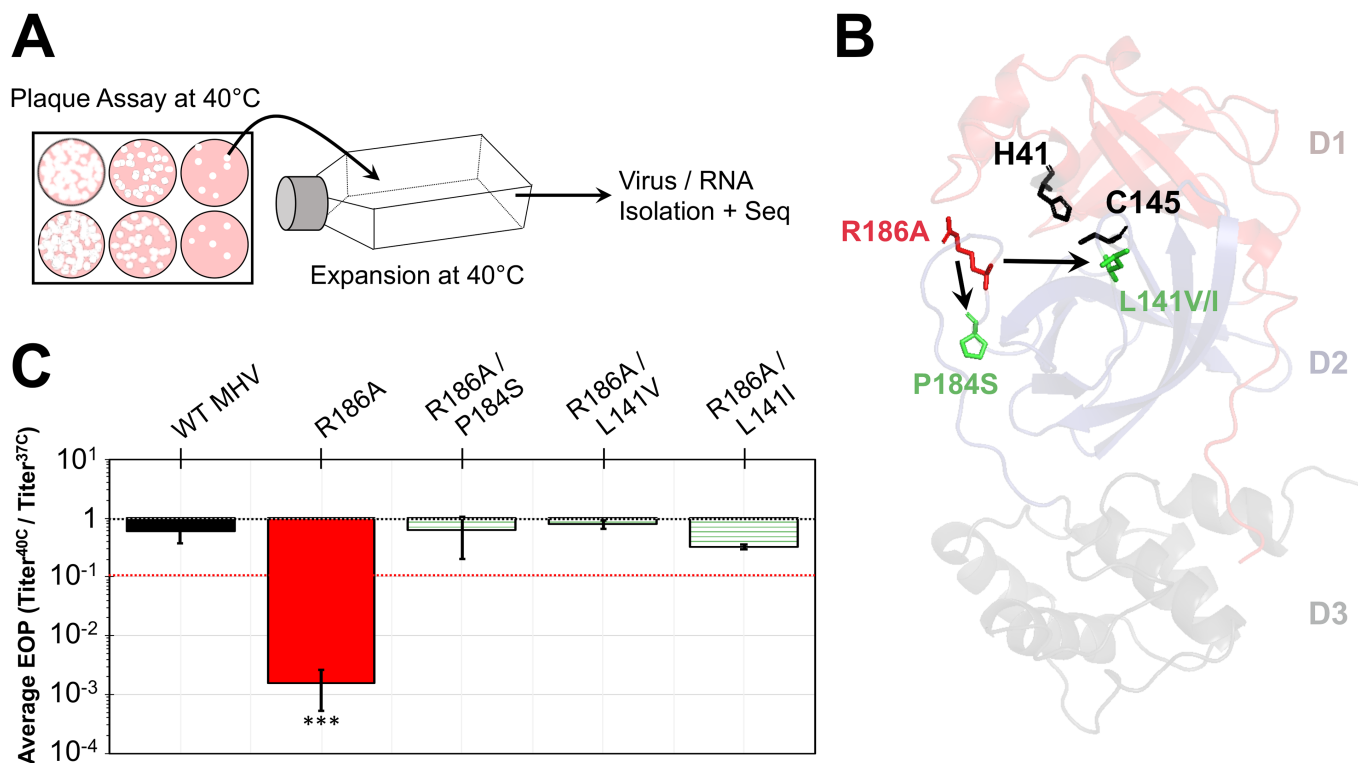

Figure 4

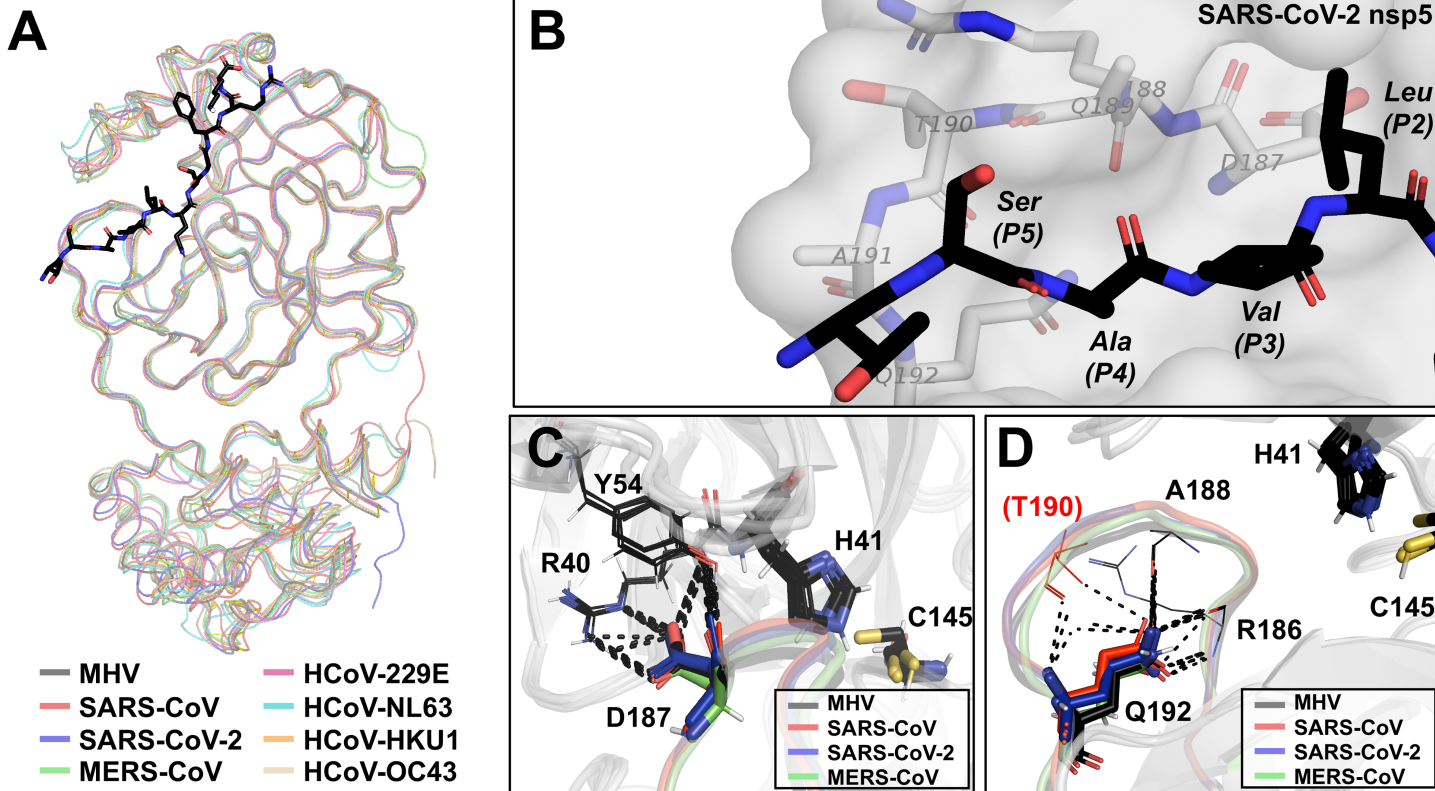

Figure 5
